# Supplementary material for: Investigating the source of acoustic anisotropy in the Asmari Formation, a fractured carbonate reservoir, using a well in the Southwest Iran
Source: Research Square preprint supplement (doi:10.21203/rs.3.rs-7629982/v1), 2025-10-27
Supplement: Supplementary file 1 [file 82b8e393954138d80da5d452.docx]

**Highlights:**

- **Fracture connectivity dominates anisotropy** – Acoustic anisotropy in the Asmari Formation is mainly controlled by fracture abundance and connectivity, while facies variability exerts only a weak background influence.
- **Zone-specific anisotropy trends** – Zone 1 shows the strongest anisotropy (FD ≈ 2.5 m⁻¹, RC ≈ 0.075), Zone 2 moderate anisotropy, Zone 3 is nearly isotropic, Zone 4 demonstrates weak anisotropy due to poor connectivity, and Zone 5 records spurious anisotropy caused by borehole instabilities.
- **Integrated workflow effectiveness** – Combining facies analysis, borehole imaging, geometry assessment, and advanced dipole sonic processing enables clear separation of true formation anisotropy from borehole-related artifacts.
- **Borehole effects as false indicators** – Breakouts and washouts in Zone 5 artificially enhance anisotropy signatures, highlighting the need to correct for borehole geometry before interpreting reservoir properties.
- **Practical implications for reservoir management** – The study confirms that anisotropy decreases systematically from Zone 1 to Zone 3 and emphasizes that reliable fracture permeability predictions require integrating geological and geophysical datasets for improved reservoir development strategies.
